# Supplementary material for: Size-exclusion chromatography as a stand-alone methodology identifies novel markers in mass spectrometry analyses of plasma-derived vesicles from healthy individuals
Source: PubMed Central journal article supplement — J Extracell Vesicles. 2015 Jul 6;4:10.3402/jev.v4.27378. doi: 10.3402/jev.v4.27378 (PMC4495624; doi:10.3402/jev.v4.27378), 2015-07-06
Supplement: JEV-4-27378-s003.pdf [file JEV-4-27378-s003.pdf]

## Sheet1

### SUPPLEMENTARY TABLE 1 – Top 20 most common proteins from plasma

Protein names and respective official Gene Symbols for the top 20 most abundant proteins from plasma.

|    | Protein name              | Gene symbols               |
|----|---------------------------|----------------------------|
| 1  | Acid-1-Glycoprotein       | ORM1                       |
| 2  | Albumin                   | ALB                        |
| 3  | Apolipoprotein A1         | APOA1                      |
| 4  | Apolipoprotein A2         | APOA2                      |
| 5  | Apolipoprotein B          | APOB                       |
| 6  | Ceruloplasmin             | CP                         |
| 7  | Complement C1q            | C1QA; C1QC                 |
| 8  | Complement C3             | C3                         |
| 9  | Complement C4             | C4                         |
| 10 | Fibrinogen                | FGG; FGA; FGB              |
| 11 | Haptoglobin               | HP                         |
| 12 | IgAs                      | IGHA1; IGHA2               |
| 13 | IgDs                      | IGHD                       |
| 14 | IgGs                      | IGHG1; IGHG2; IGHG3; IGHG4 |
| 15 | IgMs                      | IGHM                       |
| 16 | Plasminogen               | PLG                        |
| 17 | Prealbumin                | TTR                        |
| 18 | Tranferrin                | TF                         |
| 19 | $\alpha$ -1-Antitrypsin   | SERPINA1                   |
| 20 | $\alpha$ -2-Macroglobulin | A2M                        |
