# Supplementary material for: Size-exclusion chromatography as a stand-alone methodology identifies novel markers in mass spectrometry analyses of plasma-derived vesicles from healthy individuals
Source: PubMed Central journal article supplement — J Extracell Vesicles. 2015 Jul 6;4:10.3402/jev.v4.27378. doi: 10.3402/jev.v4.27378 (PMC4495624; doi:10.3402/jev.v4.27378), 2015-07-06
Supplement: JEV-4-27378-s004.pdf [file JEV-4-27378-s004.pdf]

Sheet1

**SUPPLEMENTARY TABLE 2 – Non-plasma high-throughput datasets from ExoCarta**

List of 67 studies from ExoCarta that have used sources other than plasma for the isolation of extracellular vesicles/exosomes.

| Pubmed ID / DOI          | Organisms                 | Description                                                                                                                                       | Sample type                 | Sample name                                        | year |
|--------------------------|---------------------------|---------------------------------------------------------------------------------------------------------------------------------------------------|-----------------------------|----------------------------------------------------|------|
| <a href="#">10545503</a> | Mus musculus              | Molecular characterization of dendritic cell-derived exosomes. Selective accumulation of the heat shock protein hsc73.                            | Dendritic cells             | D1                                                 | 1999 |
| <a href="#">11487543</a> | Homo sapiens              | Intestinal epithelial cells secrete exosome-like vesicles.                                                                                        | Intestinal epithelial cells | HT29-19A T84-DRB1*0401/CIITA                       | 2001 |
| <a href="#">11145662</a> | Mus musculus              | Mast cell-dependent B and T lymphocyte activation is mediated by the secretion of immunologically active exosomes.                                | Mast cells                  | P815 MC9 Bone marrow-derived mast cells            | 2001 |
| <a href="#">11390481</a> | Mus musculus              | Proteomic analysis of dendritic cell-derived exosomes: a secreted subcellular compartment distinct from apoptotic vesicles.                       | Dendritic cells             | D1                                                 | 2001 |
| <a href="#">12519789</a> | Homo sapiens              | Proteomic and biochemical analyses of human B cell-derived exosomes. Potential implications for their function and multivesicular body formation. | B cells                     | RN (HLA-DR15+)                                     | 2003 |
| <a href="#">15478216</a> | Homo sapiens              | Proteomic analysis of melanoma-derived exosomes by two-dimensional polyacrylamide gel electrophoresis and mass spectrometry.                      | Melanoma cells              | MeWo SK-MEL-28                                     | 2004 |
| <a href="#">15326289</a> | Homo sapiens              | Identification and proteomic profiling of exosomes in human urine.                                                                                | Urine                       | Urine - Normal                                     | 2004 |
| <a href="#">16081791</a> | Mus musculus              | Proteomic analysis of microglia-derived exosomes: metabolic role of the aminopeptidase CD13 in neuropeptide catabolism.                           | Microglia                   | N9                                                 | 2005 |
| <a href="#">17486113</a> | Mus musculus Homo sapiens | Exosome-mediated transfer of mRNAs and microRNAs is a novel mechanism of genetic exchange between cells.                                          | Mast cells                  | MC9 Bone marrow-derived mast cells HMC-1           | 2007 |
| <a href="#">17956143</a> | Homo sapiens              | Proteomic analysis of microvesicles derived from human colorectal cancer cells.                                                                   | Colorectal cancer cells     | HT29                                               | 2007 |
| <a href="#">19837982</a> | Homo sapiens              | Proteomic and bioinformatic analysis of immunoaffinity-purified exosomes derived from the human colon tumor cell line LIM1215.                    | Colorectal cancer cells     | LIM1215                                            | 2009 |
| <a href="#">15111327</a> | Homo sapiens              | Proteomic analysis of exosomes secreted by human mesothelioma cells.                                                                              | Mesothelioma cells          | PMR-MM7 PMR-MM8                                    | 2004 |
| <a href="#">19109410</a> | Mus musculus              | Proteomic and immunologic analyses of brain tumor exosomes.                                                                                       | Brain tumor                 | SMA560vIII                                         | 2008 |
| <a href="#">16446100</a> | Rattus norvegicus         | Exosomes are released by cultured cortical neurones.                                                                                              | Cortical neurones           | Neurones                                           | 2006 |
| <a href="#">21136642</a> | Mus musculus              | Oligodendrocytes secrete exosomes containing major myelin and stress-protective proteins: Trophic support for axons?                              | Oligodendrocytes            | Oligodendrocytes Oli-neu                           | 2007 |
| <a href="#">19190083</a> | Homo sapiens              | Characterization of exosome-like vesicles released from human tracheobronchial ciliated epithelium: a possible role in innate defense.            | Tracheobronchial cells      | Tracheobronchial epithelial cells                  | 2009 |
| <a href="#">19367702</a> | Rattus norvegicus         | Characterization and Comprehensive Proteome Profiling of Exosomes Secreted by Hepatocytes.                                                        | Hepatocytes                 | Hepatocytes                                        | 2008 |
| <a href="#">15210972</a> | Mus musculus              | Cells release prions in association with exosomes.                                                                                                | Mov neuroglial cell         | Mov neuroglial cell                                | 2004 |
| <a href="#">17641064</a> | Homo sapiens              | Exosomes with immune modulatory features are present in human breast milk.                                                                        | Breast milk                 | Breast milk - colostrum                            | 2007 |
| <a href="#">17641064</a> | Homo sapiens              | Exosomes with immune modulatory features are present in human breast milk.                                                                        | Breast milk                 | Breast milk - mature milk                          | 2007 |
| <a href="#">14975938</a> | Homo sapiens              | Proteomic analysis of exosomes isolated from human malignant pleural effusions.                                                                   | Malignant pleural effusions | Pleural Fluid - Breast cancer                      | 2004 |
| <a href="#">14975938</a> | Homo sapiens              | Proteomic analysis of exosomes isolated from human malignant pleural effusions.                                                                   | Malignant pleural effusions | Pleural Fluid - Lung cancer                        | 2004 |
| <a href="#">14975938</a> | Homo sapiens              | Proteomic analysis of exosomes isolated from human malignant pleural effusions.                                                                   | Malignant pleural effusions | Pleural Fluid - Mesothelioma                       | 2004 |
| <a href="#">17133577</a> | Mus musculus              | Association of citrullinated proteins with synovial exosomes.                                                                                     | Synovial fluid              | Synovial fluid - osteoarthritis and reactive arthr | 2006 |

## Sheet1

|          |                   |                                                                                                                                                                           |                                 |                                       |      |
|----------|-------------------|---------------------------------------------------------------------------------------------------------------------------------------------------------------------------|---------------------------------|---------------------------------------|------|
| 17133577 | Mus musculus      | Association of citrullinated proteins with synovial exosomes.                                                                                                             | Synovial fluid                  | Synovial fluid - rheumatoid arthritis | 2006 |
| 19056867 | Homo sapiens      | Large-scale proteomics and phosphoproteomics of urinary exosomes.                                                                                                         | Urine                           | Urine - Normal                        | 2009 |
| 19415654 | Homo sapiens      | Proteomics of MUC1-containing lipid rafts from plasma membranes and exosomes of human breast carcinoma cells MCF-7.                                                       | Breast cancer cells             | MCF-7                                 | 2009 |
| 19199708 | Homo sapiens      | Proteomic analysis of human parotid gland exosomes by multidimensional protein identification technology (MudPIT).                                                        | Saliva                          | Saliva                                | 2009 |
| 18494037 | Mus musculus      | Difference gel electrophoresis analysis of Ras-transformed fibroblast cell-derived exosomes.                                                                              | Embryonic fibroblast cells      | NIH3T3                                | 2008 |
| 20224111 | Homo sapiens      | Proteomics analysis of bladder cancer exosomes.                                                                                                                           | Bladder cancer cells            | HT1376                                | 2010 |
| 20458337 | Homo sapiens      | MHC class II-associated proteins in B-cell exosomes and potential functional implications for exosome biogenesis - Sample 1                                               | B cells                         | RN (HLA-DR15)                         | 2010 |
| 20458337 | Homo sapiens      | MHC class II-associated proteins in B-cell exosomes and potential functional implications for exosome biogenesis -Sample 2                                                | B cells                         | RN (HLA-DR15)                         | 2010 |
| 20458337 | Homo sapiens      | MHC class II-associated proteins in B-cell exosomes and potential functional implications for exosome biogenesis - Sample 3                                               | B cells                         | RN (HLA-DR15)                         | 2010 |
| 20424270 | Rattus norvegicus | Exosomes account for vesicle-mediated transcellular transport of activatable phospholipases and prostaglandins.                                                           | Basophilic leukemia cells       | RBL-2H3                               | 2010 |
| 21828046 | Rattus norvegicus | The proteo-lipidic composition of exosomes changes during reticulocyte maturation.                                                                                        | Reticulocytes                   | Reticulocytes - D2 Rep 1              | 2011 |
| 20124479 | Rattus norvegicus | Cell surface tetraspanin Tspan8 contributes to molecular pathways of exosome-induced endothelial cell activation.                                                         | Pancreatic adenocarcinoma cells | AS                                    | 2010 |
| 21828046 | Rattus norvegicus | The proteo-lipidic composition of exosomes changes during reticulocyte maturation.                                                                                        | Reticulocytes                   | Reticulocytes - D4 Rep 1              | 2011 |
| 21828046 | Rattus norvegicus | The proteo-lipidic composition of exosomes changes during reticulocyte maturation.                                                                                        | Reticulocytes                   | Reticulocytes - D7 Rep 1              | 2011 |
| 21828046 | Rattus norvegicus | The proteo-lipidic composition of exosomes changes during reticulocyte maturation.                                                                                        | Reticulocytes                   | Reticulocytes - D2 Rep 2              | 2011 |
| 21828046 | Rattus norvegicus | The proteo-lipidic composition of exosomes changes during reticulocyte maturation.                                                                                        | Reticulocytes                   | Reticulocytes - D4 Rep 2              | 2011 |
| 21828046 | Rattus norvegicus | The proteo-lipidic composition of exosomes changes during reticulocyte maturation.                                                                                        | Reticulocytes                   | Reticulocytes - D7 Rep 2              | 2011 |
| 21828046 | Rattus norvegicus | The proteo-lipidic composition of exosomes changes during reticulocyte maturation.                                                                                        | Reticulocytes                   | Reticulocytes - D2 Rep 3              | 2011 |
| 21828046 | Rattus norvegicus | The proteo-lipidic composition of exosomes changes during reticulocyte maturation.                                                                                        | Reticulocytes                   | Reticulocytes - D4 Rep 3              | 2011 |
| 21828046 | Rattus norvegicus | The proteo-lipidic composition of exosomes changes during reticulocyte maturation.                                                                                        | Reticulocytes                   | Reticulocytes - D7 Rep 3              | 2011 |
| 21082674 | Homo sapiens      | Comprehensive analysis of low-abundance proteins in human urinary exosomes using peptide ligand library technology, peptide OFFGEL fractionation and nanoHPLC-chip-MS/MS. | Urine                           | Urine - Normal                        | 2010 |
| 21763319 | Homo sapiens      | Characterization of soluble and exosomal forms of the EGFR released from pancreatic cancer cells.                                                                         | Pancreatic adenocarcinoma cells | Panc1                                 | 2011 |
| 21557262 | Homo sapiens      | Proteomic identification of exosomal LRG1: A potential urinary biomarker for detecting NSCLC.                                                                             | Urine                           | Urine - Normal                        | 2011 |
| 21557262 | Homo sapiens      | Proteomic identification of exosomal LRG1: A potential urinary biomarker for detecting NSCLC.                                                                             | Urine                           | Urine - Lung cancer                   | 2011 |
| 21505438 | Homo sapiens      | Unidirectional transfer of microRNA-loaded exosomes from T cells to antigen-presenting cells.                                                                             | T cells                         | J77                                   | 2011 |
| 21505438 | Homo sapiens      | Unidirectional transfer of microRNA-loaded exosomes from T cells to antigen-presenting cells.                                                                             | B cells                         | Raji                                  | 2011 |
| 21505438 | Homo sapiens      | Unidirectional transfer of microRNA-loaded exosomes from T cells to antigen-presenting cells.                                                                             | Dendritic cells                 | Dendritic cells                       | 2011 |
| 21362503 | Homo sapiens      | Protein profile of exosomes from trabecular meshwork cells.                                                                                                               | Tabecular meshwork cells        | Tabecular meshwork cells              | 2011 |
| 21362503 | Homo sapiens      | Protein profile of exosomes from trabecular meshwork cells.                                                                                                               | Urine                           | Urine - Normal                        | 2011 |

## Sheet1

|                                 |              |                                                                                                             |                        |               |      |
|---------------------------------|--------------|-------------------------------------------------------------------------------------------------------------|------------------------|---------------|------|
| 21276792                        | Homo sapiens | Morphologic and proteomic characterization of exosomes released by cultured extravillous trophoblast cells. | Trophoblast cells      | Sw71          | 2011 |
| DOI:10.1007/978-1-62703-200-1_3 | Homo sapiens | Mesenchymal Stem Cell Exosomes: The Future MSC-based Therapy?                                               | Mesenchymal stem cells | huES9.E1      | 2011 |
| 18309083                        | Mus musculus | Ceramide triggers budding of exosome vesicles into multivesicular endosomes                                 | Oligodendrocytes       | Oli-neu cells | 2008 |
| 22723089                        | Homo sapiens | Prostate cancer cell derived exosomes                                                                       | Prostate cancer cells  | PC3 - Rep 2   | 2012 |
| 22723089                        | Homo sapiens | Prostate cancer cell derived exosomes                                                                       | Prostate cancer cells  | PC3 - Rep 3   | 2012 |
| 22723089                        | Homo sapiens | Prostate cancer cell derived exosomes                                                                       | Prostate cancer cells  | DU145 - Rep 2 | 2012 |
| 22723089                        | Homo sapiens | Prostate cancer cell derived exosomes                                                                       | Prostate cancer cells  | DU145 - Rep 3 | 2012 |
| 22723089                        | Homo sapiens | Prostate cancer cell derived exosomes                                                                       | Prostate cancer cells  | VCaP - Rep 2  | 2012 |
| 22723089                        | Homo sapiens | Prostate cancer cell derived exosomes                                                                       | Prostate cancer cells  | VCaP - Rep 3  | 2012 |
| 22723089                        | Homo sapiens | Prostate cancer cell derived exosomes                                                                       | Prostate cancer cells  | LNCaP - Rep 2 | 2012 |
| 22723089                        | Homo sapiens | Prostate cancer cell derived exosomes                                                                       | Prostate cancer cells  | LNCaP - Rep 3 | 2012 |
| 22723089                        | Homo sapiens | Prostate cancer cell derived exosomes                                                                       | Prostate cancer cells  | C4-2 - Rep 2  | 2012 |
| 22723089                        | Homo sapiens | Prostate cancer cell derived exosomes                                                                       | Prostate cancer cells  | C4-2 - Rep 3  | 2012 |
| 22723089                        | Homo sapiens | Prostate cancer cell derived exosomes                                                                       | Prostate cancer cells  | RWPE - Rep 2  | 2012 |
