# Supplementary material for: Size-exclusion chromatography as a stand-alone methodology identifies novel markers in mass spectrometry analyses of plasma-derived vesicles from healthy individuals
Source: PubMed Central journal article supplement — J Extracell Vesicles. 2015 Jul 6;4:10.3402/jev.v4.27378. doi: 10.3402/jev.v4.27378 (PMC4495624; doi:10.3402/jev.v4.27378), 2015-07-06
Supplement: JEV-4-27378-s005.pdf [file JEV-4-27378-s005.pdf]

## PROTEOMICS

**SUPPLEMENTARY TABLE 3 - Mass spectrometry identification of proteins in vesicle preparations isolated by ExoSpin or size exclusion chromatography.**

Listings of human proteins identified by LC-ESI-MS/MS in healthy plasma-derived exosomal preparations obtained by Exo-Spin or size exclusion chromatography (SEC), from three donors.

**A** = Proteins detected with at least 3 peptides of high confidence.

**B** = Proteins detected with 2 peptides of high confidence.

**C** = Proteins detected with 1 peptide of high confidence

| Index | Uniprot ID | Gene Symbol | Product description                       | Exo-Spin |         |         | Size Exclusion Chromatography |                |             |            |            | Number of identifications |
|-------|------------|-------------|-------------------------------------------|----------|---------|---------|-------------------------------|----------------|-------------|------------|------------|---------------------------|
|       |            |             |                                           | Donor 1  | Donor 2 | Donor 3 | Donor 1                       |                | Donor 2     | Donor 3    |            |                           |
|       |            |             |                                           |          |         |         | Fractions 7+8                 | Fractions 9+10 | Fraction 11 | Fraction 9 | Fraction 8 |                           |
| 1     | O43866     | CD5L        | CD5 antigen-like                          | A        | A       | A       | A                             | A              | A           | A          | A          | 8                         |
| 2     | P01023     | ABM         | Alpha-B-macroglobulin                     | A        | A       | A       | A                             | A              | A           | A          | A          | 8                         |
| 3     | P01024     | CA          | Complement CA                             | A        | A       | A       | A                             | A              | A           | A          | A          | 8                         |
| 4     | P01834     | IGKC        | Ig kappa chain C region                   | A        | A       | A       | A                             | A              | A           | A          | A          | 8                         |
| 5     | P01857     | IGHG1       | Ig gamma-1 chain C region                 | A        | A       | A       | A                             | A              | A           | A          | A          | 8                         |
| 6     | P01871     | IGHM        | Ig mu chain C region                      | A        | A       | A       | A                             | A              | A           | A          | A          | 8                         |
| 7     | P01876     | IGHA1       | Ig alpha-1 chain C region                 | A        | A       | A       | A                             | A              | A           | A          | A          | 8                         |
| 8     | P02671-2   | FGA         | Isoform B of Fibrinogen alpha chain       | A        | A       | A       | A                             | A              | A           | A          | A          | 8                         |
| 9     | P02675     | FGB         | Fibrinogen beta chain                     | A        | A       | A       | A                             | A              | A           | A          | A          | 8                         |
| 10    | P02679-2   | FGG         | Isoform Gamma-A of Fibrinogen gamma chain | A        | A       | A       | A                             | A              | A           | A          | A          | 8                         |
| 11    | P02747     | C1QC        | Complement C1q subcomponent subunit C     | A        | A       | A       | C                             | C              | A           | C          | C          | 8                         |
| 12    | P02768     | ALB         | Serum albumin                             | A        | A       | A       | A                             | A              | A           | A          | A          | 8                         |
| 13    | P04003     | C4BPA       | C4b-binding protein alpha chain           | A        | A       | A       | A                             | A              | A           | A          | A          | 8                         |
| 14    | P04114     | APOB        | Apolipoprotein B-1                        | A        | A       | A       | A                             | A              | A           | A          | A          | 8                         |
| 15    | P04220     | NA          | Ig mu heavy chain disease protein         | A        | A       | A       | A                             | A              | A           | A          | A          | 8                         |
| 16    | P08519     | LPA         | Apolipoprotein(a)                         | A        | A       | A       | A                             | A              | A           | C          | A          | 8                         |
| 17    | P0CG05     | IGLCB       | Ig lambda-B chain C regions               | A        | A       | A       | A                             | A              | A           | A          | A          | 8                         |
| 18    | P13645     | KRT1        | Keratin, type I cytoskeletal 1            | A        | A       | A       | A                             | A              | A           | A          | A          | 8                         |
| 19    | P35908     | KRTB        | Keratin, type II cytoskeletal B epidermal | A        | A       | B       | A                             | A              | A           | A          | A          | 8                         |
| 20    | Q08380     | LGALSABP    | Galectin-A-binding protein                | A        | A       | C       | A                             | A              | A           | A          | A          | 8                         |
| 21    | P00739     | HPR         | Haptoglobin-related protein               | A        | A       | A       | A                             | A              |             |            | A          | 7                         |
| 22    | P01617     | NA          | Ig kappa chain V-II region TEW            | A        | A       | A       | C                             | A              | A           |            | B          | 7                         |
| 23    | P01620     | NA          | Ig kappa chain V-III region SIE           | A        | A       |         | A                             | A              | A           | A          | A          | 7                         |

## PROTEOMICS

|    |                 |              |                                              |   |   |   |   |   |   |   |   |   |
|----|-----------------|--------------|----------------------------------------------|---|---|---|---|---|---|---|---|---|
| 24 | <b>P01625</b>   | <b>NA</b>    | Ig kappa chain V-IV region Len               | A | A | A | C | C | C |   | B | 7 |
| 25 | <b>P01764</b>   | <b>NA</b>    | Ig heavy chain V-III region VHB6             | A | A | A | A | A | A |   | A | 7 |
| 26 | <b>P01860</b>   | <b>IGHGA</b> | Ig gamma-A chain C region                    | A | A | A |   | A | A | A | A | 7 |
| 27 | <b>P01877</b>   | <b>IGHAB</b> | Ig alpha-B chain C region                    | A | A | A | A |   | A | A | A | 7 |
| 28 | <b>P04264</b>   | <b>KRT1</b>  | Keratin, type II cytoskeletal 1              | A | A |   | A | A | A | A | A | 7 |
| 29 | <b>P01611</b>   | <b>NA</b>    | Ig kappa chain V-I region Wes                | C | B | C | C | C | C |   |   | 6 |
| 30 | <b>P01717</b>   | <b>NA</b>    | Ig lambda chain V-IV region Hil              | C | C | C |   | C | C |   | C | 6 |
| 31 | <b>P01859</b>   | <b>IGHGB</b> | Ig gamma-B chain C region                    | A | A | A | A | A | A |   |   | 6 |
| 32 | <b>P02656</b>   | <b>APOCA</b> | Apolipoprotein C-III                         | A | A | C | C | C |   |   | C | 6 |
| 33 | <b>P02745</b>   | <b>C1QA</b>  | Complement C1q subcomponent subunit A        | C | A | C |   | C | B |   | B | 6 |
| 34 | <b>P05090</b>   | <b>APOD</b>  | Apolipoprotein D                             | A | A | A | A | C |   |   | C | 6 |
| 35 | <b>P08603</b>   | <b>CFH</b>   | Complement factor H                          | A | A | A |   | A | A |   | A | 6 |
| 36 | <b>Q5T985</b>   | <b>ITIHB</b> | Inter-alpha-trypsin inhibitor heavy chain HB | A | A | A |   |   | A | C | C | 6 |
| 37 | <b>Q9Y6R7</b>   | <b>FCGBP</b> | IgGFC-binding protein                        | C |   |   | A | A | B | A | A | 6 |
| 38 | <b>P35527</b>   | <b>KRT9</b>  | Keratin, type I cytoskeletal 9               |   | B |   | A | A | A | A | A | 6 |
| 39 | <b>P0CG04</b>   | <b>IGLC1</b> | Ig lambda-1 chain C regions                  |   |   | A | A | A | A | A | A | 6 |
| 40 | <b>B0UZ83</b>   | <b>C4A</b>   | Complement C4 beta chain                     | A | A | A |   | B |   |   | A | 5 |
| 41 | <b>P01781</b>   | <b>NA</b>    | Ig heavy chain V-III region GAL              | C | A | A |   | C | C |   |   | 5 |
| 42 | <b>P02647</b>   | <b>APOA1</b> | Apolipoprotein A-I                           | A | A | A | A |   | A |   |   | 5 |
| 43 | <b>P02649</b>   | <b>APOE</b>  | Apolipoprotein E                             | A | A | A | A |   |   |   | A | 5 |
| 44 | <b>P02652</b>   | <b>APOAB</b> | Apolipoprotein A-II                          | A | A | A | C |   | C |   |   | 5 |
| 45 | <b>P02787</b>   | <b>TF</b>    | Serotransferrin                              | A | A | A | A |   | A |   |   | 5 |
| 46 | <b>P04275</b>   | <b>VWF</b>   | von Willebrand factor                        | A |   | A | A |   |   | A | A | 5 |
| 47 | <b>P04433</b>   | <b>NA</b>    | Ig kappa chain V-III region VG (Fragment)    | A | A | A |   |   | C |   | C | 5 |
| 48 | <b>P07225</b>   | <b>PROS1</b> | Vitamin K-dependent protein S                | A | A |   |   | A |   | A | A | 5 |
| 49 | <b>P23083</b>   | <b>NA</b>    | Ig heavy chain V-I region VA5                | A | B | C |   | C | C |   |   | 5 |
| 50 | <b>P01765</b>   | <b>NA</b>    | Ig heavy chain V-III region TIL              |   | A | A |   | A | A | B |   | 5 |
| 51 | <b>P01596</b>   | <b>NA</b>    | Ig kappa chain V-I region CAR                |   |   | C | C | C |   | C | C | 5 |
| 52 | <b>P01766</b>   | <b>NA</b>    | Ig heavy chain V-III region BRO              |   |   |   | A | A | A | A | A | 5 |
| 53 | <b>O75636-2</b> | <b>FCNA</b>  | Isoform B of Ficolin-A                       | A | A | C | C |   |   |   |   | 4 |
| 54 | <b>P00738</b>   | <b>HP</b>    | Haptoglobin                                  | A | A | A |   |   |   |   | A | 4 |

## PROTEOMICS

|    |           |          |                                                  |   |   |   |   |   |   |   |   |   |
|----|-----------|----------|--------------------------------------------------|---|---|---|---|---|---|---|---|---|
| 55 | P01591    | IGJ      | Immunoglobulin J chain                           | A | A | A |   | A |   |   |   | 4 |
| 56 | P01597    | NA       | Ig kappa chain V-I region DEE                    | A | A |   | C |   |   |   | C | 4 |
| 57 | P01743    | NA       | Ig heavy chain V-I region HGA                    | A | C | C |   | C |   |   |   | 4 |
| 58 | P01763    | NA       | Ig heavy chain V-III region WEA                  | C | B |   |   | A |   |   | B | 4 |
| 59 | P01861    | IGHG4    | Ig gamma-4 chain C region                        | A | A | A |   |   | A |   |   | 4 |
| 60 | P02790    | HPX      | Hemopexin                                        | A | A | A | C |   |   |   |   | 4 |
| 61 | P04004    | VTN      | Vitronectin                                      | A | A | A | C |   |   |   |   | 4 |
| 62 | P06310    | NA       | Ig kappa chain V-II region RPMI 641              | A | A | A |   |   | B |   |   | 4 |
| 63 | P06727    | APOA4    | Apolipoprotein A-IV                              | B | B | A | C |   |   |   |   | 4 |
| 64 | P0C0L5    | C4B      | Complement C4-B                                  | A | A | A |   |   |   | A |   | 4 |
| 65 | P13671    | C6       | Complement component C6                          | A | A | A |   |   | C |   |   | 4 |
| 66 | P20851-2  | C4BPB    | Isoform B of C4b-binding protein beta chain      | A | A | A |   |   | C |   |   | 4 |
| 67 | D6RA08    | C1QB     | Complement C1q subcomponent subunit B (Fragment) |   |   | A | C | A |   |   | C | 4 |
| 68 | G8JL88    | APOL1    | Apolipoprotein L1                                |   |   | C | B | A |   |   | B | 4 |
| 69 | P01825    | NA       | Ig heavy chain V-II region NEWM                  |   |   |   | C | C | C |   | C | 4 |
| 70 | P02751-10 | FN1      | Isoform 1 of Fibronectin                         |   |   |   | A | A |   | A | A | 4 |
| 71 | P81605    | DCD      | Dermcidin                                        |   |   |   | B |   | C | C | C | 4 |
| 72 | Q0VAC5    | HP       | HP protein                                       |   |   |   | A | A | A | C |   | 4 |
| 73 | Q86YZ3    | HRNR     | Homerin                                          |   |   |   | A |   | A | A | C | 4 |
| 74 | B4E1H2    | SERPING1 | Plasma protease C1 inhibitor                     | A | A | C |   |   |   |   |   | 3 |
| 75 | D6R934    | C1QB     | Complement C1q subcomponent subunit B            | A | A |   |   |   | A |   |   | 3 |
| 76 | E7EQ48    | PRG4     | Proteoglycan 4                                   | A |   |   |   |   | C |   | C | 3 |
| 77 | G3XAM2    | CFI      | Complement factor I light chain                  | A | A | A |   |   |   |   |   | 3 |
| 78 | H0YFH3    | C1R      | Complement C1r subcomponent                      | A | A |   |   |   | A |   |   | 3 |
| 79 | O95445-2  | APOM     | Isoform B of Apolipoprotein M                    | C |   |   | C | C |   |   |   | 3 |
| 80 | P00450    | CP       | Ceruloplasmin                                    | A | A | A |   |   |   |   |   | 3 |
| 81 | P00734    | FB       | Prothrombin                                      | A | A | A |   |   |   |   |   | 3 |
| 82 | P00736    | C1R      | Complement C1r subcomponent                      | A | A | A |   |   |   |   |   | 3 |
| 83 | P00747    | PLG      | Plasminogen                                      | A | A | A |   |   |   |   |   | 3 |
| 84 | P00751    | CFB      | Complement factor B                              | A | A | A |   |   |   |   |   | 3 |
| 85 | P01008    | SERPINC1 | Antithrombin-III                                 | A | A | A |   |   |   |   |   | 3 |

## PROTEOMICS

|     |                  |                 |                                           |   |   |   |   |   |
|-----|------------------|-----------------|-------------------------------------------|---|---|---|---|---|
| 86  | <b>P01009</b>    | <b>SERPINA1</b> | Alpha-1-antitrypsin                       | A | A | A |   | 3 |
| 87  | <b>P01019</b>    | <b>AGT</b>      | Angiotensinogen                           | C | A | C |   | 3 |
| 88  | <b>P01031</b>    | <b>C5</b>       | Complement C5                             | A | A | A |   | 3 |
| 89  | <b>P01042-2</b>  | <b>KNG1</b>     | Isoform LMW of Kininogen-1                | A | A | A |   | 3 |
| 90  | <b>P01598</b>    | <b>NA</b>       | Ig kappa chain V-I region EU              | A | A |   | A | 3 |
| 91  | <b>P01602</b>    | <b>IGKV1-5</b>  | Ig kappa chain V-I region HK1B (Fragment) | C | C |   | C | 3 |
| 92  | <b>P01608</b>    | <b>NA</b>       | Ig kappa chain V-I region Roy             | A | A | A |   | 3 |
| 93  | <b>P01610</b>    | <b>NA</b>       | Ig kappa chain V-I region WEA             | A | A | A |   | 3 |
| 94  | <b>P01699</b>    | <b>NA</b>       | Ig lambda chain V-I region VOR            | C | C | C |   | 3 |
| 95  | <b>P01700</b>    | <b>NA</b>       | Ig lambda chain V-I region HA             | A | B | A |   | 3 |
| 96  | <b>P01702</b>    | <b>NA</b>       | Ig lambda chain V-I region NIG-64         | C | B | C |   | 3 |
| 97  | <b>P01705</b>    | <b>NA</b>       | Ig lambda chain V-II region NEI           | C | C | C |   | 3 |
| 98  | <b>P01767</b>    | <b>NA</b>       | Ig heavy chain V-III region BUT           | C | C | C |   | 3 |
| 99  | <b>P01777</b>    | <b>NA</b>       | Ig heavy chain V-III region TEI           | C | C | C |   | 3 |
| 100 | <b>P01880</b>    | <b>IGHD</b>     | Ig delta chain C region                   | A | A | A |   | 3 |
| 101 | <b>P02655</b>    | <b>APOCB</b>    | Apolipoprotein C-II                       | A | A | A |   | 3 |
| 102 | <b>P02743</b>    | <b>APCS</b>     | Serum amyloid P-component                 | A | A | B |   | 3 |
| 103 | <b>P02748</b>    | <b>C9</b>       | Complement component C9                   | A | A | A |   | 3 |
| 104 | <b>P02749</b>    | <b>APOH</b>     | Beta-B-glycoprotein 1                     | A | A | A |   | 3 |
| 105 | <b>P02751-14</b> | <b>FN1</b>      | Isoform 14 of Fibronectin                 | A | A | A |   | 3 |
| 106 | <b>P02760</b>    | <b>AMBP</b>     | Protein AMBP                              | A | A | A |   | 3 |
| 107 | <b>P02765</b>    | <b>AHSG</b>     | Alpha-B-HS-glycoprotein                   | C | B | A |   | 3 |
| 108 | <b>P02766</b>    | <b>TTR</b>      | Transthyretin                             | A | A | A |   | 3 |
| 109 | <b>P04196</b>    | <b>HRG</b>      | Histidine-rich glycoprotein               | A | A | A |   | 3 |
| 110 | <b>P04211</b>    | <b>NA</b>       | Ig lambda chain V region 4A               | C | C | C |   | 3 |
| 111 | <b>P04217</b>    | <b>A1BG</b>     | Alpha-1B-glycoprotein                     | A | A | A |   | 3 |
| 112 | <b>P04434</b>    | <b>NA</b>       | Ig kappa chain V-III region VH (Fragment) | A | A | B |   | 3 |
| 113 | <b>P05160</b>    | <b>F1AB</b>     | Coagulation factor XIII B chain           | B |   | A | B | 3 |
| 114 | <b>P06396</b>    | <b>GSN</b>      | Gelsolin                                  | A | A | A |   | 3 |
| 115 | <b>P07357</b>    | <b>C8A</b>      | Complement component C8 alpha chain       | A | A | A |   | 3 |
| 116 | <b>P07360</b>    | <b>C8G</b>      | Complement component C8 gamma chain       | A | A | A |   | 3 |

## PROTEOMICS

|     |          |          |                                                                          |   |   |   |  |   |   |  |   |  |  |  |  |  |  |  |   |   |
|-----|----------|----------|--------------------------------------------------------------------------|---|---|---|--|---|---|--|---|--|--|--|--|--|--|--|---|---|
| 117 | P09871   | C1S      | Complement C1s subcomponent                                              | A | A | A |  |   |   |  |   |  |  |  |  |  |  |  |   | 3 |
| 118 | P10643   | C7       | Complement component C7                                                  | A | A | A |  |   |   |  |   |  |  |  |  |  |  |  |   | 3 |
| 119 | P15814   | IGLL1    | Immunoglobulin lambda-like polypeptide 1                                 | C | C |   |  |   |   |  |   |  |  |  |  |  |  |  | C | 3 |
| 120 | P19827   | ITIH1    | Inter-alpha-trypsin inhibitor heavy chain H1                             | A | A | A |  |   |   |  |   |  |  |  |  |  |  |  |   | 3 |
| 121 | P36955   | SERPINF1 | Pigment epithelium-derived factor                                        | B | A | A |  |   |   |  |   |  |  |  |  |  |  |  |   | 3 |
| 122 | P80748   | NA       | Ig lambda chain V-III region LOI                                         | A | A | C |  |   |   |  |   |  |  |  |  |  |  |  |   | 3 |
| 123 | Q03591   | CFHR1    | Complement factor H-related protein 1                                    | A | A | A |  |   |   |  |   |  |  |  |  |  |  |  |   | 3 |
| 124 | Q16720-8 | ATPBBA   | Isoform ZG of Plasma membrane calcium-transporting AT                    | C | C | C |  |   |   |  |   |  |  |  |  |  |  |  |   | 3 |
| 125 | P02763   | ORM1     | Alpha-1-acid glycoprotein 1                                              |   |   | B |  |   |   |  |   |  |  |  |  |  |  |  | C | 3 |
| 126 | P02774   | GC       | Vitamin D-binding protein                                                |   | A | A |  | A |   |  |   |  |  |  |  |  |  |  |   | 3 |
| 127 | P18135   | NA       | Ig kappa chain V-III region HAH                                          |   | A | A |  |   |   |  |   |  |  |  |  |  |  |  | A | 3 |
| 128 | P69905   | HBA1     | Hemoglobin subunit alpha                                                 |   | C | B |  | B |   |  |   |  |  |  |  |  |  |  |   | 3 |
| 129 | G5E9F8   | PROS1    | Protein S (Alpha), isoform CRA_b                                         |   |   | A |  | C |   |  |   |  |  |  |  |  |  |  | B | 3 |
| 130 | P01593   | NA       | Ig kappa chain V-I region AG                                             |   |   | A |  |   |   |  |   |  |  |  |  |  |  |  | C | 3 |
| 131 | A1L4H1   | SSC5D    | Soluble scavenger receptor cysteine-rich domain-containing protein SSC5D |   |   |   |  |   | A |  |   |  |  |  |  |  |  |  | C | 3 |
| 132 | P01042-3 | KNG1     | Isoform A of Kininogen-1                                                 |   |   |   |  |   | C |  | C |  |  |  |  |  |  |  | C | 3 |
| 133 | P02533   | KRT14    | Keratin, type I cytoskeletal 14                                          |   |   |   |  |   | A |  |   |  |  |  |  |  |  |  | A | 3 |
| 134 | P02538   | KRT6A    | Keratin, type II cytoskeletal 6A                                         |   |   |   |  |   | A |  |   |  |  |  |  |  |  |  | A | 3 |
| 135 | P13647   | KRT5     | Keratin, type II cytoskeletal 5                                          |   |   |   |  |   | A |  |   |  |  |  |  |  |  |  | A | 3 |
| 136 | Q5D862   | FLGB     | Filaggrin-B                                                              |   |   |   |  |   | C |  |   |  |  |  |  |  |  |  | C | 3 |
| 137 | B9A064   | IGLL5    | Immunoglobulin lambda-like polypeptide 5                                 | A | A |   |  |   |   |  |   |  |  |  |  |  |  |  |   | 2 |
| 138 | E9PHK0   | CLECAB   | Tetranectin                                                              | C | B |   |  |   |   |  |   |  |  |  |  |  |  |  |   | 2 |
| 139 | F5GY80   | C8B      | Complement component C8 beta chain                                       | A | A |   |  |   |   |  |   |  |  |  |  |  |  |  |   | 2 |
| 140 | F5GZ11   | LDHC     | L-lactate dehydrogenase C chain                                          | C |   |   |  |   |   |  |   |  |  |  |  |  |  |  | C | 2 |
| 141 | F8W7M9   | FBLN1    | Fibulin-1                                                                | B | B |   |  |   |   |  |   |  |  |  |  |  |  |  |   | 2 |
| 142 | H0YJW1   | METTL17  | Methyltransferase-like protein 17, mitochondrial (Fragment               | C |   |   |  |   |   |  |   |  |  |  |  |  |  |  | C | 2 |
| 143 | H7BZM6   | SPEG     | Striated muscle preferentially-expressed protein kinase (                | C |   |   |  |   |   |  |   |  |  |  |  |  |  |  | C | 2 |
| 144 | O14791   | APOL1    | Apolipoprotein L1                                                        | A | A |   |  |   |   |  |   |  |  |  |  |  |  |  |   | 2 |
| 145 | P01011   | SERPINAA | Alpha-1-antichymotrypsin                                                 | A | A |   |  |   |   |  |   |  |  |  |  |  |  |  |   | 2 |
| 146 | P01613   | NA       | Ig kappa chain V-I region Ni                                             | B | A |   |  |   |   |  |   |  |  |  |  |  |  |  |   | 2 |
| 147 | P01616   | NA       | Ig kappa chain V-II region MIL                                           | C |   |   |  |   |   |  |   |  |  |  |  |  |  |  | C | 2 |

PROTEOMICS

|     |          |          |                                                                        |   |   |   |   |   |   |   |
|-----|----------|----------|------------------------------------------------------------------------|---|---|---|---|---|---|---|
| 148 | P01715   | NA       | Ig lambda chain V-IV region Bau                                        | C | C |   |   |   |   | 2 |
| 149 | P01771   | NA       | Ig heavy chain V-III region HIL                                        | C |   |   | C |   |   | 2 |
| 150 | P01779   | NA       | Ig heavy chain V-III region TUR                                        | A |   |   |   |   | A | 2 |
| 151 | P01824   | NA       | Ig heavy chain V-II region WAH                                         | C | C |   |   |   |   | 2 |
| 152 | P03952   | KLKB1    | Plasma kallikrein                                                      | B | A |   |   |   |   | 2 |
| 153 | P04430   | NA       | Ig kappa chain V-I region BAN                                          | C | C |   |   |   |   | 2 |
| 154 | P06331   | NA       | Ig heavy chain V-II region ARH-77                                      | B | C |   |   |   |   | 2 |
| 155 | P10909-4 | CLU      | Isoform 4 of Clusterin                                                 | A | A |   |   |   |   | 2 |
| 156 | P27918   | CFP      | Properdin                                                              | A |   | A |   |   |   | 2 |
| 157 | P36980-2 | CFHRB    | Isoform Short of Complement factor H-related protein B                 | A |   | A |   |   |   | 2 |
| 158 | Q14624   | ITIH4    | Inter-alpha-trypsin inhibitor heavy chain H4                           | A |   | A |   |   |   | 2 |
| 159 | Q16610   | ECM1     | Extracellular matrix protein 1                                         | C |   | C |   |   |   | 2 |
| 160 | Q5TFM2   | CFH      | Complement factor H                                                    | A |   | A |   |   |   | 2 |
| 161 | Q86X18   | C19ORF68 | Uncharacterized protein C19orf68                                       | C | C |   |   |   |   | 2 |
| 162 | A0M8Q6   | IGLC7    | Ig lambda-7 chain C region                                             |   |   | A | A |   |   | 2 |
| 163 | E9PAQ1   | CFP      | Properdin                                                              |   |   | A |   | C |   | 2 |
| 164 | P00488   | F1AA1    | Coagulation factor XIII A chain                                        |   | C |   |   |   | B | 2 |
| 165 | P00748   | F1B      | Coagulation factor XII                                                 |   |   | A | A |   |   | 2 |
| 166 | P01623   | NA       | Ig kappa chain V-III region WOL                                        |   |   | A | A |   |   | 2 |
| 167 | P01714   | NA       | Ig lambda chain V-III region SH                                        |   |   | C | C |   |   | 2 |
| 168 | P35858   | IGFALS   | Insulin-like growth factor-binding protein complex acid labile subunit |   |   | A | C |   |   | 2 |
| 169 | P10909-3 | CLU      | Isoform A of Clusterin                                                 |   |   |   | A | C |   | 2 |
| 170 | P35542   | SAA4     | Serum amyloid A-4 protein                                              |   |   |   | C | C |   | 2 |
| 171 | B1AN99   | PRSSA    | Trypsin-A (Fragment)                                                   |   |   |   | C |   | C | 2 |
| 172 | D6RHJ6   | IGJ      | Immunoglobulin J chain (Fragment)                                      |   |   |   | B |   | A | 2 |
| 173 | F5GWS6   | LDHC     | L-lactate dehydrogenase C chain                                        |   |   |   | C | C |   | 2 |
| 174 | F5GXS0   | C4B      | C4b-B                                                                  |   |   |   | C |   | A | 2 |
| 175 | P01009-2 | SERPINA1 | Isoform B of Alpha-1-antitrypsin                                       |   |   | A |   | A |   | 2 |
| 176 | P08779   | KRT16    | Keratin, type I cytoskeletal 16                                        |   |   | A |   |   | A | 2 |
| 177 | P20930   | FLG      | Filaggrin                                                              |   |   | C |   |   | C | 2 |
| 178 | P68871   | HBB      | Hemoglobin subunit beta                                                |   |   | A |   |   | B | 2 |

## PROTEOMICS

|     |                 |                 |                                                                                     |  |   |   |  |   |   |   |   |
|-----|-----------------|-----------------|-------------------------------------------------------------------------------------|--|---|---|--|---|---|---|---|
| 179 | <b>Q02413</b>   | <b>DSG1</b>     | Desmoglein-1                                                                        |  | A |   |  | C |   | 2 |   |
| 180 | <b>E9PEV4</b>   | <b>APOE</b>     | Apolipoprotein E (Fragment)                                                         |  |   | A |  | C |   | 2 |   |
| 181 | <b>M0QZ17</b>   | <b>SSC5D</b>    | Soluble scavenger receptor cysteine-rich domain-containing protein SSC5D (Fragment) |  |   | C |  | C |   | 2 |   |
| 182 | <b>F8W696</b>   | <b>APOA1</b>    | Truncated apolipoprotein A-I                                                        |  |   |   |  |   | C | A | 2 |
| 183 | <b>P24821-6</b> | <b>TNC</b>      | Isoform 6 of Tenascin                                                               |  |   |   |  |   | C | C | 2 |
| 184 | <b>Q5SSB9</b>   | <b>FCNA</b>     | Ficolin-A                                                                           |  |   |   |  |   | C | C | 2 |
| 185 | <b>B4DKG1</b>   | <b>NAB1</b>     | NGFI-A-binding protein 1                                                            |  |   |   |  |   |   | C | 1 |
| 186 | <b>C9J2D9</b>   | <b>NGEF</b>     | Ephexin-1 (Fragment)                                                                |  |   |   |  |   |   | C | 1 |
| 187 | <b>C9JMH6</b>   | <b>SERPINF</b>  | Alpha-B-antiplasmin (Fragment)                                                      |  |   |   |  |   |   | C | 1 |
| 188 | <b>C9JPQ9</b>   | <b>FGG</b>      | Fibrinogen gamma chain (Fragment)                                                   |  |   | A |  |   |   |   | 1 |
| 189 | <b>E9PKV2</b>   | <b>MRPL17</b>   | A9S ribosomal protein L17, mitochondrial (Fragment)                                 |  |   |   |  |   |   | C | 1 |
| 190 | <b>E9PQL7</b>   | <b>ZSCAN9</b>   | Zinc finger and SCAN domain-containing protein 9 (Fragm                             |  |   |   |  |   |   | C | 1 |
| 191 | <b>H0Y547</b>   | <b>ATP11A</b>   | Probable phospholipid-transporting ATPase 1H (Fragment)                             |  |   |   |  |   |   | C | 1 |
| 192 | <b>J3QSB2</b>   | <b>ERAL1</b>    | GTPase Era, mitochondrial (Fragment)                                                |  |   |   |  |   |   | C | 1 |
| 193 | <b>K7EL30</b>   | <b>SLC14A1</b>  | Urea transporter 1                                                                  |  |   |   |  |   |   | C | 1 |
| 194 | <b>P01621</b>   | <b>NA</b>       | Ig kappa chain V-III region NG9 (Fragment)                                          |  |   | A |  |   |   |   | 1 |
| 195 | <b>P01708</b>   | <b>NA</b>       | Ig lambda chain V-II region BUR                                                     |  |   |   |  |   |   | C | 1 |
| 196 | <b>P02774-2</b> | <b>GC</b>       | Isoform B of Vitamin D-binding protein                                              |  |   | A |  |   |   |   | 1 |
| 197 | <b>P04206</b>   | <b>NA</b>       | Ig kappa chain V-III region GOL                                                     |  |   | A |  |   |   |   | 1 |
| 198 | <b>P04208</b>   | <b>NA</b>       | Ig lambda chain V-I region WAH                                                      |  |   | B |  |   |   |   | 1 |
| 199 | <b>P06213-2</b> | <b>INSR</b>     | Isoform Short of Insulin receptor                                                   |  |   |   |  |   |   | C | 1 |
| 200 | <b>P09603-3</b> | <b>CSF1</b>     | Isoform A of Macrophage colony-stimulating factor 1                                 |  |   |   |  |   |   | C | 1 |
| 201 | <b>P48740-4</b> | <b>MASP1</b>    | Isoform 4 of Mannan-binding lectin serine protease 1                                |  |   | B |  |   |   |   | 1 |
| 202 | <b>Q2TB10</b>   | <b>ZNF8</b>     | Zinc finger protein 8                                                               |  |   |   |  |   |   | C | 1 |
| 203 | <b>Q460N5-3</b> | <b>PARP14</b>   | Isoform A of Poly [ADP-ribose] polymerase 14                                        |  |   |   |  |   |   | C | 1 |
| 204 | <b>Q5VY30</b>   | <b>RBP4</b>     | Plasma retinol-binding protein(1-18B)                                               |  |   |   |  |   |   | C | 1 |
| 205 | <b>Q6V0I7-2</b> | <b>FAT4</b>     | Isoform B of Protocadherin Fat 4                                                    |  |   |   |  |   |   | C | 1 |
| 206 | <b>Q8NH42</b>   | <b>OR4K1A</b>   | Olfactory receptor 4K1A                                                             |  |   |   |  |   |   | C | 1 |
| 207 | <b>Q9UK55</b>   | <b>SERPINA1</b> | Protein Z-dependent protease inhibitor                                              |  |   |   |  |   |   | C | 1 |
| 208 | <b>B1AJZ5</b>   | <b>MAN1C1</b>   | Mannosyl-oligosaccharide 1, B-alpha-mannosidase IC                                  |  |   |   |  |   |   | C | 1 |
| 209 | <b>F8WDX4</b>   | <b>CFH</b>      | Complement factor H                                                                 |  |   |   |  |   |   | A | 1 |

## PROTEOMICS

|     |                 |                    |                                                                              |   |   |
|-----|-----------------|--------------------|------------------------------------------------------------------------------|---|---|
| 210 | <b>H7C0L5</b>   | <b>ITIH4</b>       | A5 kDa inter-alpha-trypsin inhibitor heavy chain H4 (Fragment)               | A | 1 |
| 211 | <b>P01604</b>   | <b>NA</b>          | Ig kappa chain V-I region Kue                                                | C | 1 |
| 212 | <b>P01768</b>   | <b>NA</b>          | Ig heavy chain V-III region CAM                                              | C | 1 |
| 213 | <b>P05546</b>   | <b>SERPIND1</b>    | Heparin cofactor B                                                           | B | 1 |
| 214 | <b>P08697</b>   | <b>SERPINF8</b>    | Alpha-B-antiplasmin                                                          | A | 1 |
| 215 | <b>P0CJ68</b>   | <b>MTRNRBL1</b>    | Humanin-like protein 1                                                       | C | 1 |
| 216 | <b>P18428</b>   | <b>LBP</b>         | Lipopolysaccharide-binding protein                                           | A | 1 |
| 217 | <b>P19652</b>   | <b>ORMB</b>        | Alpha-1-acid glycoprotein B                                                  | A | 1 |
| 218 | <b>P27169</b>   | <b>PON1</b>        | Serum paraoxonase/arylesterase 1                                             | A | 1 |
| 219 | <b>P29622</b>   | <b>SERPINA4</b>    | Kallistatin                                                                  | A | 1 |
| 220 | <b>P50135</b>   | <b>HNMT</b>        | Histamine N-methyltransferase                                                | C | 1 |
| 221 | <b>Q15485-2</b> | <b>FCNB</b>        | Isoform B of Ficolin-B                                                       | C | 1 |
| 222 | <b>Q4G0P3</b>   | <b>HYDIN</b>       | Hydrocephalus-inducing protein homolog                                       | C | 1 |
| 223 | <b>Q502W7</b>   | <b>CCDCA8</b>      | Coiled-coil domain-containing protein A8                                     | C | 1 |
| 224 | <b>Q5FBE1</b>   | <b>F9</b>          | Coagulation factor IX                                                        | C | 1 |
| 225 | <b>Q86VK4-5</b> | <b>ZNF41</b>       | Isoform 5 of Zinc finger protein 41                                          | C | 1 |
| 226 | <b>Q9BX63</b>   | <b>BRIP1</b>       | Fanconi anemia group J protein                                               | C | 1 |
| 227 | <b>Q9NP80-3</b> | <b>PNPLA8</b>      | Isoform A of Calcium-independent phospholipase AB-gamma                      | C | 1 |
| 228 | <b>Q9UBP9-3</b> | <b>GULP1</b>       | Isoform A of PTB domain-containing engulfment adapter protein 1              | C | 1 |
| 229 | <b>Q9UDY2-5</b> | <b>TJPB</b>        | Isoform AA of Tight junction protein ZO-B                                    | C | 1 |
| 230 | <b>Q9Y6A5</b>   | <b>TACCA</b>       | Transforming acidic coiled-coil-containing protein A                         | C | 1 |
| 231 | <b>A6NJ16</b>   | <b>IGHV4OR15-8</b> | Putative V-set and immunoglobulin domain-containing-like protein IGHV4OR15-8 | C | 1 |
| 232 | <b>C9J7L4</b>   | <b>SLC1AAA</b>     | Solute carrier family 1A member A (Fragment)                                 | C | 1 |
| 233 | <b>E9PBC5</b>   | <b>KLKB1</b>       | Plasma kallikrein heavy chain                                                | A | 1 |
| 234 | <b>F5H456</b>   | <b>RRP1B</b>       | RRP1B-like protein                                                           | C | 1 |
| 235 | <b>F8W6P5</b>   | <b>HBB</b>         | LVV-hemorphin-7 (Fragment)                                                   | A | 1 |
| 236 | <b>F8WF42</b>   | <b>PON1</b>        | Serum paraoxonase/arylesterase 1                                             | C | 1 |
| 237 | <b>G3V3A0</b>   | <b>SERPINAA</b>    | Alpha-1-antichymotrypsin                                                     | C | 1 |
| 238 | <b>H7C2A0</b>   | <b>GK</b>          | Glycerol kinase (Fragment)                                                   | C | 1 |
| 239 | <b>O00160</b>   | <b>MYO1F</b>       | Unconventional myosin-I f                                                    | C | 1 |
| 240 | <b>O15015</b>   | <b>ZNF646</b>      | Zinc finger protein 646                                                      | C | 1 |



## PROTEOMICS

|     |                 |                |                                                                                 |          |   |
|-----|-----------------|----------------|---------------------------------------------------------------------------------|----------|---|
| 241 | <b>P01615</b>   | <b>NA</b>      | Ig kappa chain V-II region FR                                                   | <b>C</b> | 1 |
| 242 | <b>P07358</b>   | <b>C8B</b>     | Complement component C8 beta chain                                              | <b>A</b> | 1 |
| 243 | <b>P08697-2</b> | <b>SERPINF</b> | Isoform B of Alpha-B-antiplasmin                                                | <b>B</b> | 1 |
| 244 | <b>P23142</b>   | <b>FBLN1</b>   | Fibulin-1                                                                       | <b>A</b> | 1 |
| 245 | <b>P23142-4</b> | <b>FBLN1</b>   | Isoform C of Fibulin-1                                                          | <b>A</b> | 1 |
| 246 | <b>P98160</b>   | <b>HSPGB</b>   | Basement membrane-specific heparan sulfate proteoglycan core protein            | <b>C</b> | 1 |
| 247 | <b>Q05BQ5-3</b> | <b>MBTD1</b>   | Isoform A of MBT domain-containing protein 1                                    | <b>C</b> | 1 |
| 248 | <b>A2A2R6</b>   | <b>GNAS</b>    | Guanine nucleotide-binding protein G(s) subunit alpha isoforms short (Fragment) | <b>C</b> | 1 |
| 249 | <b>A2ARK8</b>   | <b>HLA-A</b>   | HLA class I histocompatibility antigen, A-68 alpha chain                        | <b>C</b> | 1 |
| 250 | <b>B4E2V5</b>   | <b>STOM</b>    | Erythrocyte band 7 integral membrane protein                                    | <b>A</b> | 1 |
| 251 | <b>E5RJD2</b>   | <b>DECR1</b>   | B,4-dienoyl-CoA reductase, mitochondrial (Fragment)                             | <b>C</b> | 1 |
| 252 | <b>E7EUT5</b>   | <b>GAPDH</b>   | Glyceraldehyde-A-phosphate dehydrogenase                                        | <b>C</b> | 1 |
| 253 | <b>E9PC84</b>   | <b>TNC</b>     | Tenascin                                                                        | <b>A</b> | 1 |
| 254 | <b>F5GXQ1</b>   | <b>ITIH4</b>   | A5 kDa inter-alpha-trypsin inhibitor heavy chain H4                             | <b>C</b> | 1 |
| 255 | <b>F5H1C6</b>   | <b>FERMTA</b>  | Fermitin family homolog A (Fragment)                                            | <b>C</b> | 1 |
| 256 | <b>F5H3C5</b>   | <b>SODB</b>    | Superoxide dismutase [Mn], mitochondrial (Fragment)                             | <b>C</b> | 1 |
| 257 | <b>F5H823</b>   | <b>RAP1B</b>   | Ras-related protein Rap-1b (Fragment)                                           | <b>C</b> | 1 |
| 258 | <b>F5H8H6</b>   | <b>LDHA</b>    | L-lactate dehydrogenase A chain                                                 | <b>C</b> | 1 |
| 259 | <b>F8VQQ4</b>   | <b>TUBA1A</b>  | Tubulin alpha-1A chain (Fragment)                                               | <b>C</b> | 1 |
| 260 | <b>F8W0P7</b>   | <b>ATP5B</b>   | ATP synthase subunit beta, mitochondrial (Fragment)                             | <b>C</b> | 1 |
| 261 | <b>H0YLE2</b>   | <b>ANXAB</b>   | Annexin AB (Fragment)                                                           | <b>C</b> | 1 |
| 262 | <b>H0YLF3</b>   | <b>BBM</b>     | Beta-B-microglobulin form pl 5.A (Fragment)                                     | <b>B</b> | 1 |
| 263 | <b>H7C4A9</b>   | <b>PRKARBA</b> | cAMP-dependent protein kinase type II-alpha regulatory subunit (Fragment)       | <b>C</b> | 1 |
| 264 | <b>I3L4X8</b>   | <b>ITGBA</b>   | Integrin beta                                                                   | <b>A</b> | 1 |
| 265 | <b>J3QSA3</b>   | <b>UBB</b>     | Ubiquitin (Fragment)                                                            | <b>C</b> | 1 |
| 266 | <b>K7EIE7</b>   | <b>ACLY</b>    | ATP-citrate synthase (Fragment)                                                 | <b>C</b> | 1 |
| 267 | <b>K7EP73</b>   | <b>GAPDHS</b>  | Glyceraldehyde-A-phosphate dehydrogenase, testis-specific (Fragment)            | <b>C</b> | 1 |
| 268 | <b>K7ER74</b>   | <b>APOCB</b>   | Apolipoprotein C-II                                                             | <b>A</b> | 1 |
| 269 | <b>K7ER19</b>   | <b>APOC1</b>   | Truncated apolipoprotein C-I (Fragment)                                         | <b>C</b> | 1 |
| 270 | <b>P02549-2</b> | <b>SPTA1</b>   | Isoform B of Spectrin alpha chain, erythrocytic 1                               | <b>B</b> | 1 |
| 271 | <b>P02730</b>   | <b>SLC4A1</b>  | Band A anion transport protein                                                  | <b>A</b> | 1 |

## PROTEOMICS

|     |                 |                 |                                                                   |   |   |
|-----|-----------------|-----------------|-------------------------------------------------------------------|---|---|
| 272 | <b>P05109</b>   | <b>S1A8</b>     | Protein S1-A8                                                     | C | 1 |
| 273 | <b>P07996</b>   | <b>THBS1</b>    | Thrombospondin-1                                                  | C | 1 |
| 274 | <b>P08514-3</b> | <b>ITGABB</b>   | Isoform A of Integrin alpha-IIb                                   | A | 1 |
| 275 | <b>P11166</b>   | <b>SLCBA1</b>   | Solute carrier family B, facilitated glucose transporter member 1 | A | 1 |
| 276 | <b>P11171-4</b> | <b>EPB41</b>    | Isoform 4 of Protein 4.1                                          | C | 1 |
| 277 | <b>P11277-3</b> | <b>SPTB</b>     | Isoform A of Spectrin beta chain, erythrocytic                    | C | 1 |
| 278 | <b>P12111-4</b> | <b>COL6AA</b>   | Isoform 4 of Collagen alpha-A(VI) chain                           | C | 1 |
| 279 | <b>P24752</b>   | <b>ACAT1</b>    | Acetyl-CoA acetyltransferase, mitochondrial                       | C | 1 |
| 280 | <b>P25311</b>   | <b>AZGP1</b>    | Zinc-alpha-B-glycoprotein                                         | B | 1 |
| 281 | <b>P26038</b>   | <b>MSN</b>      | Moesin                                                            | A | 1 |
| 282 | <b>P28070</b>   | <b>PSMB4</b>    | Proteasome subunit beta type-4                                    | C | 1 |
| 283 | <b>P29508-2</b> | <b>SERPINBA</b> | Isoform B of Serpin BA                                            | C | 1 |
| 284 | <b>P31146</b>   | <b>CORO1A</b>   | Coronin-1A                                                        | C | 1 |
| 285 | <b>P31946-2</b> | <b>YWHAB</b>    | Isoform Short of 14-A-A protein beta/alpha                        | A | 1 |
| 286 | <b>P35579</b>   | <b>MYH9</b>     | Myosin-9                                                          | A | 1 |
| 287 | <b>P54652</b>   | <b>HSPAB</b>    | Heat shock-related 7 kDa protein B                                | C | 1 |
| 288 | <b>P55056</b>   | <b>APOC4</b>    | Apolipoprotein C-IV                                               | B | 1 |
| 289 | <b>P60709</b>   | <b>ACTB</b>     | Actin, cytoplasmic 1                                              | A | 1 |
| 290 | <b>P63104</b>   | <b>YWHAZ</b>    | 14-A-A protein zeta/delta                                         | A | 1 |
| 291 | <b>Q04695</b>   | <b>KRT17</b>    | Keratin, type I cytoskeletal 17                                   | A | 1 |
| 292 | <b>Q08554-2</b> | <b>DSC1</b>     | Isoform 1B of Desmocollin-1                                       | C | 1 |
| 293 | <b>Q567Q0</b>   | <b>PPIA</b>     | Peptidyl-prolyl cis-trans isomerase A                             | C | 1 |
| 294 | <b>Q5HY54</b>   | <b>FLNA</b>     | Filamin-A                                                         | A | 1 |
| 295 | <b>Q5T749</b>   | <b>KPRP</b>     | Keratinocyte proline-rich protein                                 | C | 1 |
| 296 | <b>Q5T8M8</b>   | <b>ACTA1</b>    | Actin, alpha skeletal muscle                                      | A | 1 |
| 297 | <b>Q5TCU6</b>   | <b>TLN1</b>     | Talin-1                                                           | C | 1 |
| 298 | <b>Q6BCY4-2</b> | <b>CYB5RB</b>   | Isoform B of NADH-cytochrome b5 reductase B                       | C | 1 |
| 299 | <b>Q6KB66-2</b> | <b>KRT8</b>     | Isoform B of Keratin, type II cytoskeletal 8                      | A | 1 |
| 300 | <b>Q7RTS7</b>   | <b>KRT74</b>    | Keratin, type II cytoskeletal 74                                  | A | 1 |
| 301 | <b>Q7Z794</b>   | <b>KRT77</b>    | Keratin, type II cytoskeletal 1b                                  | A | 1 |
| 302 | <b>Q8N1N4-2</b> | <b>KRT78</b>    | Isoform B of Keratin, type II cytoskeletal 78                     | A | 1 |

PROTEOMICS

|     |          |          |                                               |            |            |            |            |           |           |           |           |
|-----|----------|----------|-----------------------------------------------|------------|------------|------------|------------|-----------|-----------|-----------|-----------|
| 303 | Q9BYZ2   | LDHAL6B  | L-lactate dehydrogenase A-like 6B             | C          |            |            |            |           |           | 1         |           |
| 304 | Q9BZX4-2 | ROPN1B   | Isoform B of Ropporin-1B                      | C          |            |            |            |           |           | 1         |           |
| 305 | C9JB55   | TF       | Serotransferrin (Fragment)                    |            |            |            | C          |           |           | 1         |           |
| 306 | J3KS17   | APOH     | Beta-B-glycoprotein 1 (Fragment)              |            |            |            | C          |           |           | 1         |           |
| 307 | K7ESE1   | KRT17    | Keratin, type I cytoskeletal 17 (Fragment)    |            |            |            | C          |           |           | 1         |           |
| 308 | P01606   | NA       | Ig kappa chain V-I region OU                  |            |            |            | C          |           |           | 1         |           |
| 309 | C9IYG8   | KLKB1    | Plasma kallikrein heavy chain (Fragment)      |            |            |            |            | C         |           | 1         |           |
| 310 | C9J7V5   | CFP      | Properdin (Fragment)                          |            |            |            |            | C         |           | 1         |           |
| 311 | D6RD17   | IGJ      | Immunoglobulin J chain (Fragment)             |            |            |            |            | A         |           | 1         |           |
| 312 | F5H7E1   | ITIH1    | Inter-alpha-trypsin inhibitor heavy chain H1  |            |            |            |            | A         |           | 1         |           |
| 313 | F8WCZ6   | C1S      | Complement C1s subcomponent                   |            |            |            |            | A         |           | 1         |           |
| 314 | H7C5H1   | CFB      | Complement factor B (Fragment)                |            |            |            |            | C         |           | 1         |           |
| 315 | H7C5R1   | CP       | Ceruloplasmin (Fragment)                      |            |            |            |            | C         |           | 1         |           |
| 316 | O14791-3 | APOL1    | Isoform A of Apolipoprotein L1                |            |            |            |            | A         |           | 1         |           |
| 317 | P02751-9 | FN1      | Isoform 9 of Fibronectin                      |            |            |            |            | A         |           | 1         |           |
| 318 | P83593   | NA       | Ig kappa chain V-IV region STH (Fragment)     |            |            |            |            | C         |           | 1         |           |
| 319 | Q5T481   | RBMB     | RNA-binding protein B                         |            |            |            |            | C         |           | 1         |           |
| 320 | C9JA05   | IGJ      | Immunoglobulin J chain (Fragment)             |            |            |            |            |           | C         | 1         |           |
| 321 | F8WAS2   | ITIH1    | Inter-alpha-trypsin inhibitor heavy chain H1  |            |            |            |            | C         |           | 1         |           |
| 322 | K7ERE3   | KRT1A    | Keratin, type I cytoskeletal 1A               |            |            |            |            | A         |           | 1         |           |
| 323 | P04259   | KRT6B    | Keratin, type II cytoskeletal 6B              |            |            |            |            | A         |           | 1         |           |
| 324 | Q14CN4-3 | KRT7B    | Isoform A of Keratin, type II cytoskeletal 7B |            |            |            |            | B         |           | 1         |           |
| 325 | C9JVG0   | TF       | Serotransferrin (Fragment)                    |            |            |            |            |           | C         | 1         |           |
| 326 | P01009-3 | SERPINA1 | Isoform A of Alpha-1-antitrypsin              |            |            |            |            |           | C         | 1         |           |
| 327 | P01605   | NA       | Ig kappa chain V-I region Lay                 |            |            |            |            |           | C         | 1         |           |
| 328 | P01707   | NA       | Ig lambda chain V-II region TRO               |            |            |            |            |           | C         | 1         |           |
| 329 | P06311   | NA       | Ig kappa chain V-III region IARC/BL41         |            |            |            |            |           | C         | 1         |           |
| 330 | P06312   | IGKV4-1  | Ig kappa chain V-IV region (Fragment)         |            |            |            |            |           | B         | 1         |           |
|     |          |          | <b>TOTAL (A+B)</b>                            | <b>114</b> | <b>124</b> | <b>103</b> | <b>73</b>  | <b>41</b> | <b>54</b> | <b>41</b> | <b>49</b> |
|     |          |          | <b>TOTAL (A+B+C)</b>                          | <b>160</b> | <b>157</b> | <b>143</b> | <b>130</b> | <b>65</b> | <b>79</b> | <b>56</b> | <b>72</b> |
