# Supplementary material for: Size-exclusion chromatography as a stand-alone methodology identifies novel markers in mass spectrometry analyses of plasma-derived vesicles from healthy individuals
Source: PubMed Central journal article supplement — J Extracell Vesicles. 2015 Jul 6;4:10.3402/jev.v4.27378. doi: 10.3402/jev.v4.27378 (PMC4495624; doi:10.3402/jev.v4.27378), 2015-07-06
Supplement: JEV-4-27378-s008.pdf [file JEV-4-27378-s008.pdf]

**SUPPLEMENTARY TABLE 6 - Detailed information of peptides used for single-peptide-based protein identification of exosome markers.**

Three exosome markers (GAPDH, RAP1B and ANXA2) were identified by single peptides in the sample 'fractions 7+8' from donor 1.

The parameters of identification of these peptides are given in detail.

PEP = posterior error probability, PSMs = peptide-spectrum matches.

| Sequence        | GENE  | Accession | # PSMs | Modifications        | Area    | q-Value | PEP        | XCorr | Charge | # Missed Cleavages | m/z    |
|-----------------|-------|-----------|--------|----------------------|---------|---------|------------|-------|--------|--------------------|--------|
| VPTANVSVDLTcR   | GAPDH | E7EUT5    | 1      | C13(Carbamidomethyl) | 8,494E5 | 0       | 0,00008586 | 3,05  | 2      | 0                  | 765,40 |
| VKDTDDVPMILVGNK | RAP1B | F5H823    | 1      |                      | 6,140E5 | 0       | 4,518E-009 | 2,90  | 2      | 1                  | 821,94 |
| TNQELQEINR      | ANXA2 | HOYLE2    | 1      |                      | 5,459E5 | 0       | 0,00001631 | 2,18  | 2      | 0                  | 622,31 |
