# Supplementary figures and images for: Size-exclusion chromatography as a stand-alone methodology identifies novel markers in mass spectrometry analyses of plasma-derived vesicles from healthy individuals
Source: PubMed Central journal article supplement — J Extracell Vesicles. 2015 Jul 6;4:10.3402/jev.v4.27378. doi: 10.3402/jev.v4.27378 (PMC4495624; doi:10.3402/jev.v4.27378), 2015-07-06

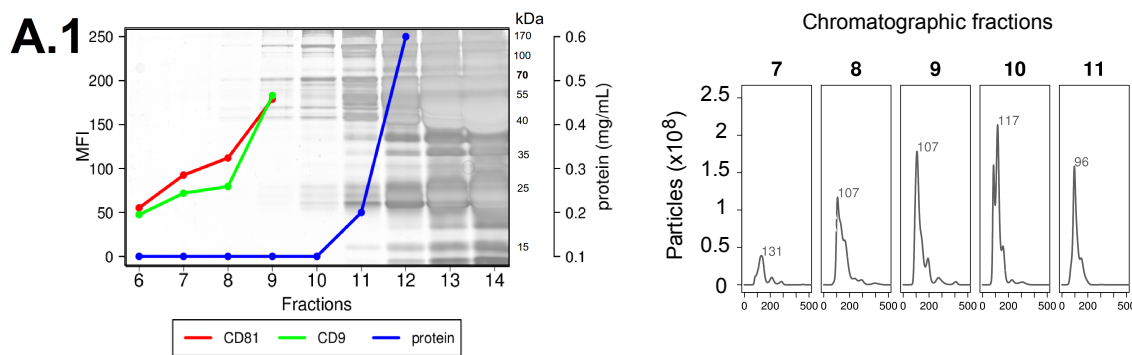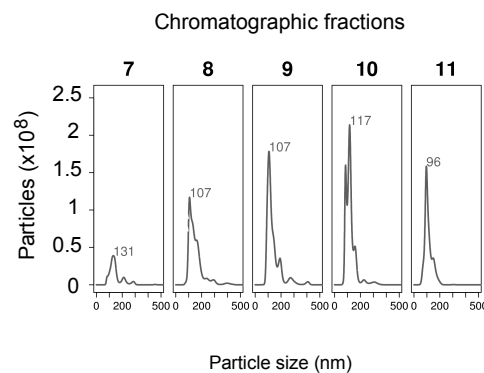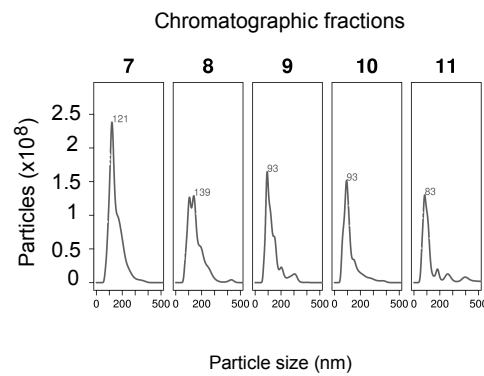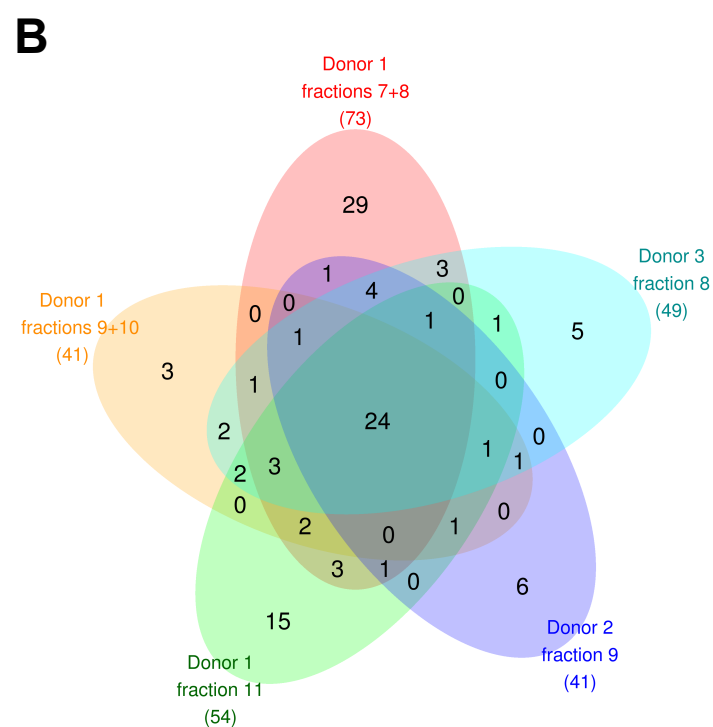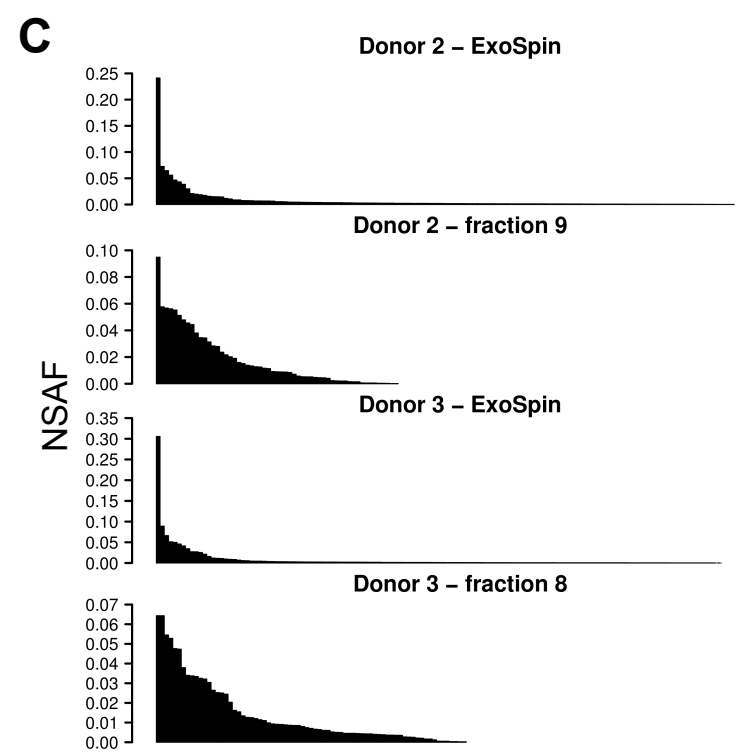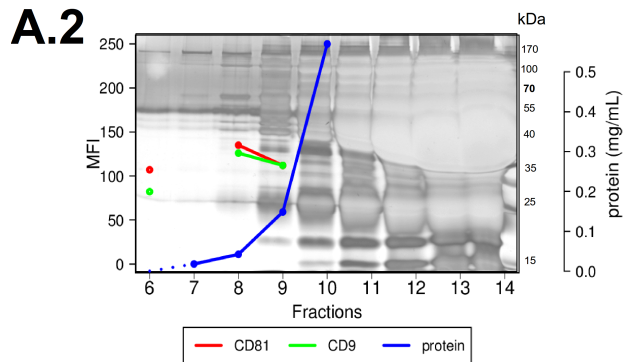

Supplement: JEV-4-27378-s001.pdf [file JEV-4-27378-s001.pdf]

# Supplementary Figure 2

## A

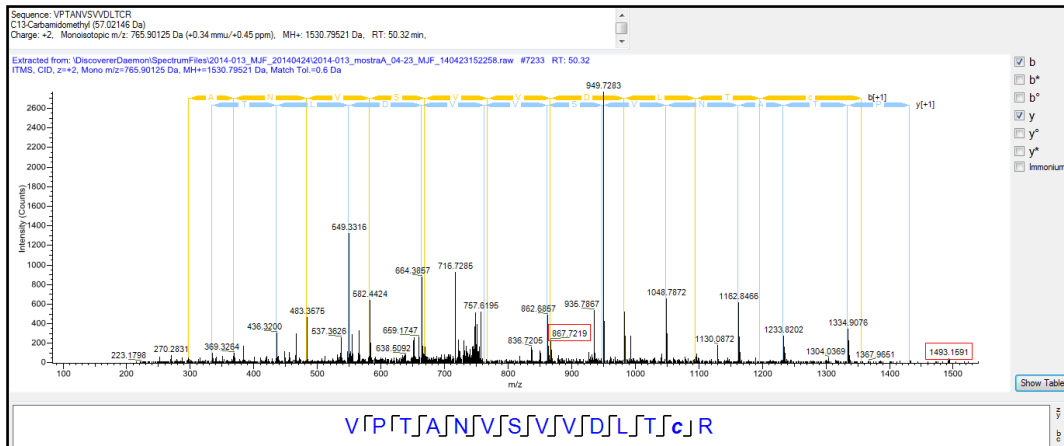

## B

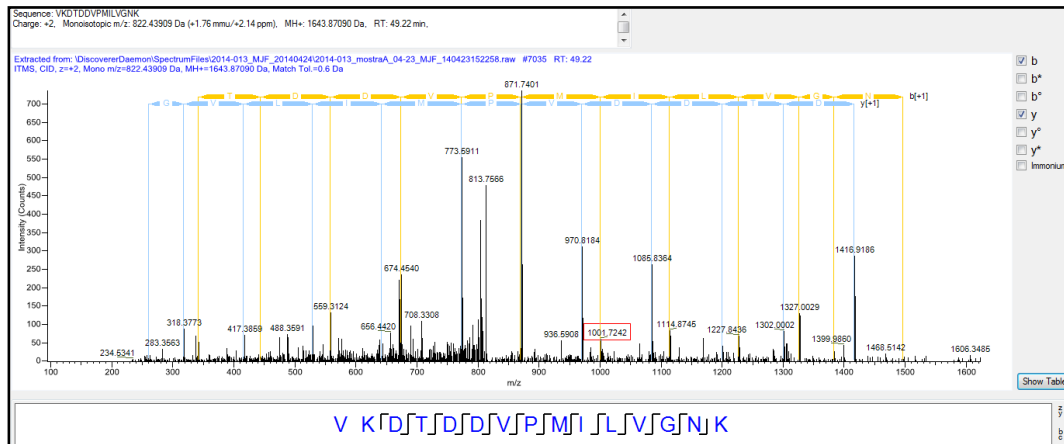

## C

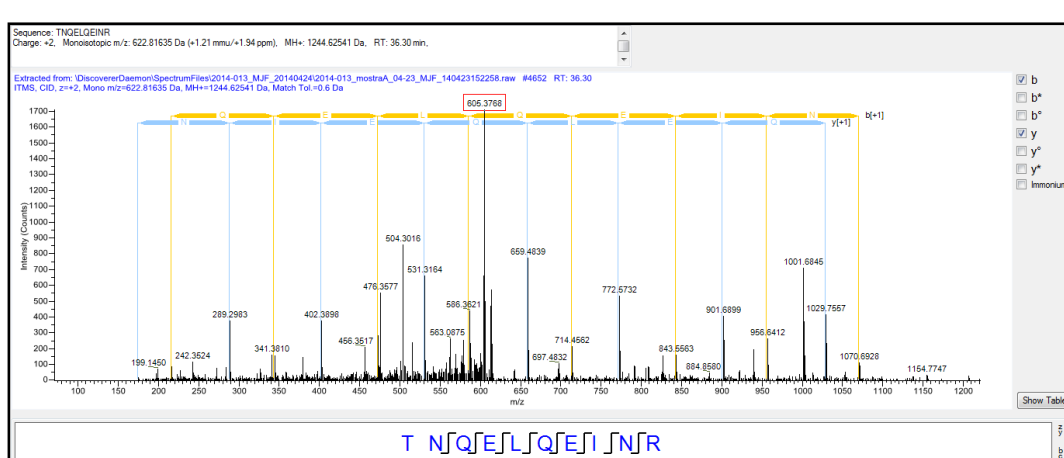

Supplement: JEV-4-27378-s002.pdf [file JEV-4-27378-s002.pdf]
